# Differential scanning fluorimetric analysis of the amino-acid binding to taste receptor using a model receptor protein, the ligand-binding domain of fish T1r2a/T1r3

Takashi Yoshida<sup>1</sup>, Norihisa Yasui<sup>1</sup>, Yuko Kusakabe<sup>2</sup>, Chiaki Ito<sup>1</sup>, Miki Akamatsu<sup>3</sup>, Atsuko Yamashita<sup>1\*</sup>

<sup>1</sup>Graduate School of Medicine, Dentistry and Pharmaceutical Sciences, Okayama University, Okayama, Okayama, Japan

<sup>2</sup>Food Research Institute, National Agriculture and Food Research Organization, Tsukuba, Ibaraki, Japan

<sup>3</sup>Graduate School of Agriculture, Kyoto University, Kyoto, Kyoto, Japan.

\*Corresponding author

E-mail: [a\\_yama@okayama-u.ac.jp](mailto:a_yama@okayama-u.ac.jp) (AY)

## 1 **Abstract**

2 Taste receptor type 1 (T1r) is responsible for the perception of essential nutrients,  
3 such as sugars and amino acids, and evoking sweet and umami (savory) taste sensations. T1r  
4 receptors recognize many of the taste substances at their extracellular ligand-binding domains  
5 (LBDs). In order to detect a wide array of taste substances in the environment, T1r receptors  
6 often possess broad ligand specificities. However, the entire ranges of chemical spaces and  
7 their binding characteristics to any T1rLBDs have not been extensively analyzed. In this  
8 study, we exploited the differential scanning fluorimetry (DSF) to medaka T1r2a/T1r3LBD, a  
9 current sole T1rLBD heterodimer amenable for recombinant preparation, and analyzed their  
10 thermal stabilization by adding various amino acids. The assay showed that the agonist amino  
11 acids induced thermal stabilization and shifted the melting temperatures ( $T_m$ ) of the protein.  
12 An agreement between the DSF results and the previous biophysical assay was observed,  
13 suggesting that DSF can detect ligand binding at the orthosteric-binding site in  
14 T1r2a/T1r3LBD. The assay further demonstrated that most of the tested L-amino acids, but no  
15 D-amino acid, induced  $T_m$  shifts of T1r2a/T1r3LBD, indicating the broad L-amino acid  
16 specificities of the proteins probably with several different manners of recognition. The  $T_m$   
17 shifts by each amino acid also showed a fair correlation with the responses exhibited by the  
18 full-length receptor, verifying the broad amino-acid binding profiles at the orthosteric site in  
19 LBD observed by DSF.

20

## 21 **Introduction**

22 Taste perception starts with specific molecular interactions between taste substances  
23 and taste receptors in the oral cavity. Various chemicals evoking taste sensation are  
24 categorized into five basic taste modalities and perceived by distinct receptors specialized to  
25 each modality [1, 2]. Among the five modalities, sweet, umami, and salty tastes are generally

26 recognized as preferable tastes and induce positive hedonic responses, while bitter and sour  
27 tastes primitively induce negative hedonic responses to animals, including humans [3].

28         Among the preferable taste modalities, sweetness and umami are perceived by taste  
29 receptor type 1 (T1r) proteins conserved among vertebrates [4]. T1rs are class C G  
30 protein-coupled receptors (GPCRs) [5], which commonly function as homo- or heterodimeric  
31 receptors [6]. Specifically, in mammals, T1r2/T1r3 heterodimer serves as a sweet taste  
32 receptor, while T1r1/T1r3 heterodimer serves as an umami taste receptor [7-9]. These  
33 receptors recognize major taste substances by the ligand binding domains (LBDs) located at  
34 the extracellular region [10]. T1r LBDs share an architecture known as the Venus flytrap  
35 module (VFTM) characteristic to the extracellular domains of class C GPCRs, and taste  
36 substances bind to the cleft between the bilobal subdomains composing the VFTM (Fig 1A)  
37 [11].

38         Notably, in T1rLBDs, the ligand-binding sites, referred to as the orthosteric binding  
39 sites, need to accommodate taste substances covering the most part of the chemical spaces  
40 presenting the taste modality, because a single kind of receptor is responsible for the  
41 perception of a single modality. Indeed, the orthosteric binding sites in many T1rLBDs bind a  
42 wide array of chemicals; the site in human T1r2/T1r3 sweet receptor binds various mono- to  
43 oligosaccharides as glucose, fructose, and sucrose, and artificial sweeteners as dipeptide  
44 derivatives (aspartame, neotame) or sultames (Acesulfame-K, saccharin) [10], while those in  
45 mouse T1r1/T1r3 and some of the fish T1rs bind a wide array of amino acids [9, 12, 13]. The  
46 broad ligand-binding capabilities of the orthosteric sites in T1rs contrast with those in other  
47 class C GPCRs, such as metabotropic glutamate receptors or  $\gamma$ -aminobutyric acid (GABA)  
48 receptor B, which are more or less specific to their intrinsic agonist molecules, glutamate or  
49 GABA, respectively [14, 15].

50         The details of molecular interactions between T1rs and taste substances have long

51 been unknown, due to the lack of structural information of T1rLBDs. The T1rLBD  
52 heterodimers, including human proteins, are difficult for recombinant expression and  
53 large-scale preparation [16], hampering the structural analyses. Recently, by extensive  
54 expression screening among vertebrate T1rLBDs, we solved the first crystallographic  
55 structures of the heterodimeric LBDs of T1r2-subtype a (T1r2a)/T1r3 LBD from medaka fish,  
56 *O. latipes*, an amino acid-taste receptor (Fig 1A) [11]. In the crystallographic structures,  
57 binding of taste-substance amino acids was observed at the orthosteric binding sites in  
58 T1r2a/T1r3LBD. The binding sites indeed possess favorable structural characteristics to  
59 accommodate various amino acids, such as a large space covered with a surface mosaically  
60 presenting negatively, positively and uncharged regions. Nevertheless, the entire ranges of  
61 chemical spaces and their binding characteristics to the orthosteric sites in T1r2a/T1r3, as well  
62 as any other T1rs, have not been extensively analyzed. So far, we have employed two kinds of  
63 methodologies: isothermal titration calorimetry for direct measurement of the binding heat  
64 generated by interactions between the T1rLBD protein and a taste substance; and a Förster  
65 resonance energy transfer (FRET) analysis using the T1rLBD-fluorescent protein fusions for  
66 indirect measurement of the conformational change of the protein accompanied by ligand  
67 binding [17]. However, the two methods are sample and time consuming, and only five amino  
68 acids were so far subjected to structural and biophysical analyses to examine interactions with  
69 T1r2a/T1r3LBD. In order for the extensive ligand binding analyses of the protein, an assay  
70 method with higher throughput is required.

71  
72 **Fig 1. Amino acid binding to medaka T1r2a/T1r3LBD.** (A) Crystallographic structure of  
73 medaka T1r2a/T1r3LBD in complex with L-glutamine (PDB ID: 5X2M) and a schematic  
74 drawing of the entire T1r receptor. The orthosteric binding sites in T1r2a and T1r3 are  
75 highlighted with dashed boxes. (B) Thermal melt curves of T1r2a/T1r3LBD (top) and their

76 derivatives (bottom) in the presence of 0.1 ~ 300  $\mu$ M L-glutamine, measured by DSF.

77

78 In this study, we employed a thermal shift assay analyzed by differential scanning  
79 fluorimetry (DSF) for ligand binding analysis of T1r2a/T1r3LBD [18]. The DSF measures a  
80 thermal unfolding of a protein by detecting the change of fluorescence intensity of an  
81 environmentally-sensitive fluorescence dye binding to hydrophobic regions of the protein  
82 exposed to the solvent during its denaturation [19, 20]. Because a ligand binding to the  
83 protein generally changes its thermal stability, DSF is applicable to a ligand-binding assay.  
84 Among various assay methodologies, DSF can serve as a high-throughput method since it  
85 requires a small amount of protein for a measurement (~ 1  $\mu$ g), and multiple parallel  
86 measurements are feasible by the use of conventional real-time PCR equipment. The results in  
87 this study showed that the binding of the agonist amino acids induced thermal stabilization of  
88 T1r2a/T1r3LBD, which can be detected by DSF, indicating that the method can serve as a  
89 high-throughput ligand binding assay for T1rLBDs. The DSF displayed that a wide array of  
90 L-amino acids bind to the orthosteric site in T1r2a/T1r3LBD, regardless of their  
91 physicochemical properties.

92

## 93 **Materials and Methods**

### 94 **Sample preparation**

95 The protein sample was prepared as described previously [11, 17]. Briefly,  
96 *Drosophila* S2 cells (Invitrogen) stably expressing C-terminal FLAG-tagged T1r2aLBD and  
97 T1r3LBD [11, 21] were cultured in ExpressFiveSFM (LifeTechnologies) for five days at 27  
98 °C. The T1r2a/T1r3-LBD protein was purified from the culture medium by the use of  
99 ANTI-FLAG M2 Affinity Gel (SIGMA). The purified protein was dialyzed against the assay

100 buffer (20 mM Tris-HCl, 300 mM NaCl, 2 mM CaCl<sub>2</sub>, pH 8.0).

101

## 102 **Differential scanning fluorimetry**

103 The protein sample (~1 μg) was mixed with Protein Thermal Shift Dye (Applied  
104 Biosystems) and 10~10,000 μM concentration of each amino acid in 20 μL of assay buffer  
105 and loaded to a MicroAmpR Fast Optical 48-Well Reaction Plate (Applied Biosystems).  
106 Fluorescent Intensity was measured by the StepOne Real-Time PCR System (Applied  
107 Biosystems). The temperature was raised from 25 °C to 99 °C with a velocity of 0.022 °C  
108 /sec. The reporter and quencher for detection were set as “ROX” and “none”, respectively.  
109 Apparent melting transition temperature ( $T_m$ ) was determined by the use of the peak of the  
110 derivative curve of the melt curve (dFluorescence/dT) by Protein Thermal Shift Software  
111 version 1.3 (Applied Biosystems).

112

## 113 **Data analysis**

114 The apparent dissociation constant ( $K_{d-app}$ ) derived from the DSF results was  
115 estimated based on Equation 1 proposed by Schellman [22], assuming that the unfolding of  
116 the protein is reversible:

$$117 \quad \Delta T_m = T_m - T_0 = \frac{T_m T_0 R}{\Delta H^0} \ln\left(1 + \frac{[L]}{K_{d-app}}\right) \quad (\text{Equation 1})$$

118 where  $[L]$  is the ligand concentration;  $T_m$  and  $T_0$  are the apparent melting transition  
119 temperatures in the presence and absence of the ligand;  $R$  is the gas constant;  $\Delta H^0$  is the  
120 enthalpy of unfolding at  $T_0$ , assuming that there are no significant variations under the tested  
121 conditions. If the melt curves show biphasic profiles, the second (or the right side)  $T_m$  values  
122 were adopted for calculation, as described in the Results section.

123 For multiple regression analyses shown in Fig 2B, the apparent  $T_m$  values

124 determined at different ligand concentrations were fitted to Equation 1 by using KaleidaGraph  
125 (Synergy Software), assuming that the change of the dissociation constant accompanied by  
126 the  $T_m$  shift is negligible. For fitting,  $T_0$  was fixed at 326.2 K, the experimentally determined  
127 value by DSF in the same experimental set (s.e.m. 0.2 K,  $n = 7$ ), and  $K_{d-app}$  and  $\Delta H^0$  values  
128 were set as variables.

129

130 **Fig 2. Dose-dependent  $T_m$  changes of T1r2a/T1r3LBD by the addition of amino acids.**

131 (A) Thermal melt curves of T1r2a/T1r3LBD and their derivatives in the presence of 1 ~  
132 10,000  $\mu$ M concentrations of L-alanine, arginine, glutamate, and glycine, measured by DSF.

133 (B) Dose-dependent  $T_m$  changes of T1r2a/T1r3LBD by addition of L-glutamine, alanine,  
134 arginine, glutamate, and glycine. Six technical replicates for L-glutamine and 4 technical  
135 replicates for the others were averaged and fitted to Equation 1 in Materials and Methods.  
136 Error bars, s.e.m.

137

138 For S1 Table,  $K_{d-app}$  was estimated using the apparent  $T_m$  values determined at a  
139 single ligand concentration by substituting  $T_0$  and  $\Delta H^0$  in Equation 1 with 326.1 K,  
140 determined at the same experimental set (s.e.m. 0.1 K,  $n = 20$ ), and 72.1 kcal mol<sup>-1</sup>, the  
141 average of the fitted values of the multiple regression analyses described above (s.e.m. 7.2  
142 kcal mol<sup>-1</sup>,  $n = 5$ ), respectively. The derived  $K_{d-app}$  values for L-glutamine, alanine, arginine,  
143 glutamate, and glycine were found to show good agreement with those determined by FRET,  
144 within 0.55 – 1.55 fold of the FRET EC<sub>50</sub> values, if they were determined using the  $\Delta T_m$   
145 values in the range of 6 ~ 11 K (S1 Table). On the other hand,  $\Delta T_m$  below 1 K or above 11 K  
146 resulted in larger deviations, such as below 0.5 fold or above 3 fold of the EC<sub>50</sub> values.  
147 Because  $\Delta T_m$  values for most amino acids at 10 mM concentration were observed in the range  
148 of 2 ~ 11 K,  $K_{d-app}$  values derived from the results at 10 mM were used for the further

149 analysis, with the following exceptions. For L-alanine and L-glutamine, the results at 1 mM  
150 and 0.1 mM were adopted, because  $\Delta T_m$  values were observed in the range of 6 ~ 11 K and  
151 the resulted  $K_{d-app}$  values showed the closer agreement with the FRET  $EC_{50}$  values compared  
152 to the results at 10 mM. The amino acids indicating the thermal destabilization, L-lysine and  
153 D-alanine, were not included in the further analyses.

154 The relationship between the side chain structures and  $pK_{d-app}$  ( $= \log 1/K_{d-app}$ ) values  
155 for 15 L-amino acids, excluding L-proline, was quantitatively analyzed using the classical  
156 quantitative structure-affinity relationships (QSAR) technique [23]. Classical QSAR analyses  
157 were performed using QREG ver. 2.05 [24]. The physicochemical parameters of amino acid  
158  $\alpha$ -substituent groups used for the analysis were listed in S3 Table.

159

## 160 **Receptor response assay**

161 The  $Ca^{2+}$ -flux assay was performed using Flip-In 293 cell line (Life Technologies) stably  
162 expressing full-length T1r2a, T1r3, and  $G\alpha_{16-gust44}$  as described previously [11, 17]. The  
163 response stimulated by either 5 or 10 mM amino acid was represented as  $\Delta$  RFU (delta  
164 relative fluorescence unit) defined as the maximum fluorescence intensity induced by the  
165 addition of the amino acid, subtracted with that of an assay buffer in the absence of amino  
166 acid. The estimated  $EC_{50}$  values,  $EC_{50-est}$ , were calculated using the Hill equation as follows:

$$167 \quad \Delta RFU = \frac{\Delta RFU_{max} \times [L]}{EC_{50-est} + [L]}$$

168 where  $[L]$ ,  $\Delta RFU$ ,  $\Delta RFU_{max}$  were substituted by either 5 or 10 mM,  $\Delta RFU$  values at 5 or 10  
169 mM, and 104.3, the maximum  $\Delta RFU$  value observed in the same set of experiments (by  
170 addition of 5 mM L-glutamine, a saturated concentration observed in previous studies [11,  
171 17]; s.e.m. 4.24,  $n = 12$ ).  $pEC_{50-app}$  ( $= \log 1/EC_{50-est}$ ) values for 13 or 15 amino acids,  
172 estimated from the results at 5 mM or 10 mM results, respectively, by excluding those giving



173 negative  $\Delta$ RFU values, were compared with  $pK_{d-app}$  values.

174

## 175 **Results**

### 176 **T1r2a/T1r3LBD exhibited thermal stabilization by binding a taste** 177 **substance amino acid**

178 An essential prerequisite for DSF application to a ligand binding assay is that the  
179 protein should show a shift of thermal melt curves accompanied by the ligand addition, *i.e.*,  
180 the protein should be either thermal stabilized or destabilized by ligand binding. In order to  
181 examine whether DSF is applicable to ligand binding analysis of T1r2a/T1r3LBD, we  
182 analyzed its thermal melt curves with various concentrations of L-glutamine, the amino acid  
183 taste substance to medaka T1r2a/T1r3LBD with the highest affinity to the protein so far  
184 analyzed [11].

185 T1r2a/T1r3LBD showed a thermal melt curve with a monophasic transition in the  
186 absence of amino acids (Fig 1B). The transition temperature of melting ( $T_m$ ) was determined  
187 by the derivative of the melt curve and estimated as  $53.0 \pm 0.07$  °C. The addition of  
188 L-glutamine shifted the melt curves toward the higher temperature side and changed the curve  
189 profiles with apparently biphasic transitions. In the biphasic melt curves in the presence of  
190 L-glutamine, the higher concentration of the ligand added, the higher temperature shifts were  
191 observed at the second (or the right side)  $T_m$ , as the increase of  $T_m$  ( $\Delta T_m$ ) of  $8.7 \pm 0.1$  °C in the  
192 presence of 300  $\mu$ M L-glutamine, while the first (or the left side)  $T_m$  was observed as about 50  
193 °C and did not exhibit clear thermal shifts. The results indicated that a taste-substance amino  
194 acid binding to T1r2a/T1r3LBD induces the thermal stabilization of the protein, at least at the  
195 structural portion showing the melting transition at a higher temperature side observed at the  
196 second  $T_m$ .

197

198 **DSF results displayed the binding of taste substance amino acid at**  
199 **the orthosteric sites in T1r2a/T1r3LBD**

200 Agonist-binding to the orthosteric sites in class C GPCRs is known to induce the  
201 conformational change of LBDs, either or both of the cleft closure of the VFTM architecture  
202 within a subunit or the dimer rearrangement [14]. These conformational changes are  
203 considered to induce receptor activation [25]. The crystallographic analyses of medaka  
204 T1r2a/T1r3LBD displayed that L-glutamine, alanine, arginine, glutamate, and glycine bind to  
205 the orthosteric sites [11], and the binding actually induced the conformational change of the  
206 protein as judged by FRET changes in accordance with the addition of the ligands [17]. In  
207 order to verify whether the  $T_m$  shift observed by DSF monitors the ligand binding at the  
208 orthosteric sites, we compared the DSF results in the presence of the above five amino acids  
209 with the reported results analyzed by the FRET measurement.

210 All five amino acids previously confirmed the binding to T1r2a/T1r3LBD induced  
211 the thermal stabilization of the protein, with changing the melt curve profiles as biphasic  
212 transitions (Fig 2A). We plotted the  $T_m$  values (if the melt curves are biphasic, the second  $T_m$   
213 values as described above) in the presence of 8 or 9 different concentrations of amino acid in  
214 Fig 2B. For comparison with the previous FRET results, the apparent dissociation constant  
215 ( $K_{d-app}$ ) for each amino acid was estimated using a simple thermodynamic model [22] (Table  
216 1). The  $K_{d-app}$  values determined by DSF showed fair agreement with  $EC_{50}$  values for the  
217 FRET changes with the addition of the amino acids. The results suggest that the thermal  
218 stabilization of T1r2a/T1r3LBD by the addition of amino acids detected by DSF is attributed  
219 to the ligand bindings at the orthosteric sites.

220

221 **Table 1.  $K_{d-app}$  and  $EC_{50}$  values for the amino-acid binding to T1r2a/T1r3LBD estimated**

222 **by different biophysical methods.**

| Amino acid | DSF<br>$K_{d\text{-app}}$ ( $\mu\text{M}$ ) <sup>†</sup> | FRET<br>$EC_{50}$ ( $\mu\text{M}$ ) <sup>‡</sup> |
|------------|----------------------------------------------------------|--------------------------------------------------|
| L-Gln      | 30.9 ± 5.8                                               | 11.5 ± 3.4                                       |
| L-Ala      | 54.1 ± 24.5                                              | 141 ± 37                                         |
| L-Arg      | 131 ± 66                                                 | 190 ± 35                                         |
| L-Glu      | 422 ± 211                                                | 1070 ± 382                                       |
| Gly        | 3570 ± 4090                                              | 6180 ± 3320                                      |

223 <sup>†</sup>The values are fitted parameters ± s.e. to the equation curves reported in Schellman [22]. Six  
224 technical replicates for L-glutamine and 4 technical replicates for the others were averaged  
225 and used for fitting. <sup>‡</sup>The values are reported in Nuemket, Yasui, *et al.* [11].

226

227 **T1r2a/T1r3LBD has a broad L-amino acid binding profile**  
228 **irrespective of the physicochemical properties of their**  
229  **$\alpha$ -substituent groups**

230 We extended the DSF analysis to the other amino acids to explore the ligand  
231 specificity of T1r2a/T1r3LBD. Most of the L-amino acids tested induced the shifts of  $T_m$   
232 toward the higher temperatures (Fig 3 and S1 Fig). A wide array of L-amino acids, with  
233 various physicochemical properties in terms of size, hydrophobicity/hydrophilicity, and  
234 charge, induced thermal stabilization of the protein. The results clearly indicate the broad  
235 specificity of T1r2a/T1r3LBD to L-amino acids. There are only two exceptions among those  
236 tested, L-aspartate and lysine, which shifted the melt curves toward the lower temperature side  
237 (S1 Fig), thereby suggesting the thermal destabilization of the protein.

238

239 **Fig 3. Amino-acid binding profiles of T1r2a/T1r3LBD, analyzed by DSF.** (A) Thermal  
240 stabilization of T1r2a/T1r3LBD by the addition of various amino acids. Average  $\Delta T_m$  in the  
241 presence of 0.1, 1, and 10 mM of each amino acid are shown. Error bars, s.e.m. ( $n = 4$ ). (B)  
242 Responses of the T1r2a/T1r3 full-length receptor to various amino acids in 5 or 10 mM  
243 concentration monitored as an elevation of intracellular  $Ca^{2+}$  elevation. The average  $\Delta RFU$   
244 (difference in fluorescence intensity of the calcium indicator) and s.e.m. of 6 technical  
245 replicates for each amino acid are shown.

246

247 In contrast to binding abilities of L-amino acids to T1r2a/T1r3, a representative  
248 D-amino acid, D-alanine, did not induce a significant  $T_m$  shift by adding up to 10 mM, despite  
249 the fact that its enantiomer L-alanine exhibited large  $T_m$  shifts (Figs 2, 3). These results  
250 indicate that the protein has specificity to L-amino acids, as observed on the conformation  
251 changes of LBD indicated by FRET changes [11].

252 In order to verify the amino acid binding profiles of T1r2a/T1r3LBD observed by  
253 DSF described above, the results were compared with the response assay using the full-length  
254 receptor. The T1r2a/T1r3 receptor from *O. latipes* reportedly responds to a wide array of  
255 L-amino acids [12]. We confirmed the broad specificity on L-amino acid responses of this  
256 receptor by use of the same gene clones used for the DSF analyses (AB925918 and  
257 AB925919; Fig 3B and S2 Table). In contrast, D-alanine induced significantly weak responses  
258 compared to its enantiomer L-alanine (Fig 3B), as D-glutamine reported previously [11].

259 Because of the limitation of the experimental system, which does not allow full  
260 exploration to high amino-acid concentrations to determine the  $EC_{50}$  values of low-affinity  
261 ligands [11], the relationships between the DSF results and the response assay results were  
262 assessed by use of a couple of alternative parameters. If we compared the observed  $T_m$  shifts

263 ( $\Delta T_m$ ) of the LBD at 10 mM amino acid analyzed by DSF with the observed responses  
264 ( $\Delta RFU$ ) by addition of the same ligand concentration, both values showed a moderate  
265 positive correlation ( $n = 18$ ,  $r = 0.700$ ; S2 Fig). In addition, we estimated the binding  
266 affinities and the potencies of the receptor responses from the DSF and the response assay  
267 results at a single concentration, respectively (S1 and S2 Tables), and confirmed that the  
268 p-scaled values of both also showed a moderate positive correlation ( $n = 15$ ,  $r = 0.769$  or  $n =$   
269  $13$ ,  $r = 0.748$ ; S2 Fig). These results indicated the correlation between the amino-acid binding  
270 profiles of T1r2a/T1r3LBD observed by DSF and the receptor response profiles of the  
271 full-length T1r2a/T1r3 and confirmed the broad amino-acid specificity of this protein.

272           In the DSF analyses, while most of the L-amino-acids induced thermal stabilization  
273 of T1r2a/T2r3LBD, the extent of  $T_m$  shifts of each amino acid was varied, suggesting their  
274 different affinities to the protein. In order to assess whether there are any determinant  
275 chemical properties for the affinity to the protein, classical QSAR of amino acids were  
276 performed. The relationship between the  $K_{d-app}$  values, determined above, with various  
277 parameters used in classical QSAR, such as hydrophobicity, hydration, polarity, hydrophathy,  
278 charge, and volume of the substituent groups, was inspected (S1 and S3 Tables). However, as  
279 far as analyzed, no equation showing a significant correlation with the affinities to  
280 T1r2a/T1r3LBD was obtained. The result suggests that the amino acid specificity of  
281 T1r2a/T1r3LBD is unlikely governed by a single or a combination of some physicochemical  
282 properties of a ligand but could be affected by multiple structural and physicochemical factors  
283 of both the protein and the ligand.

284

## 285 **Discussion**

286           Chemosensory receptors, including taste receptors, are required to recognize a wide  
287 array of chemicals in the environment. The crystal structure of T1r2a/T1r3LBD from *O.*

288 *latipes* showed that the orthosteric ligand-binding pockets shared favorable structural  
289 characteristics to accommodate various amino acids [11]. In this study, we first verified a  
290 correlation between the ligand-induced thermal stabilization of T1r2a/T1r3LBD analyzed by  
291 DSF and the ligand binding to the orthosteric site at the LBD. Furthermore, we showed a  
292 broad amino acid spectrum of the binding capability by T1r2a/T1r3LBD. Consistent with the  
293 previous knowledge about class C GPCR that the ligand binding at the orthosteric site induces  
294 receptor responses [6], DSF results exhibited a correlation with amino acid responses  
295 analyzed by the calcium influx assay using the full-length receptor.

296

### 297 **Amino acid specificity of T1r2a/T1r3LBD**

298 The DSF results showed the differences in the extent of  $T_m$  shifts induced by each  
299 amino acid, indicating their different affinities. The results suggest that the manner of  
300 recognition of the  $\alpha$ -substituent groups of ligand amino acids by T1r2a/T1r3LBD is not  
301 identical but varied. Indeed, it is intriguing that two pairs of basic or acidic amino acids,  
302 arginine and lysine or glutamate and aspartate, gave opposite effects to the protein; the former  
303 thermally stabilized the protein while the latter destabilized the protein (Fig 3A).

304 In this study, we could not find any significant quantitative relationships between  
305 the physicochemical properties of the amino acids and their affinities with the protein. This is  
306 consistent with the structural observation of the ligand binding-pocket in T1r2a/T1r3LBD:  
307 there are no apparent structural characteristics or functional groups to determine specificity to  
308 the  $\alpha$ -substituent groups of the bound amino acid in the protein, and the substituent groups of  
309 the different amino acids take different conformations [11]. Therefore it is likely that  
310 T1r2a/T1r3LBD has multiple different manners of recognition of the  $\alpha$ -substituent groups,  
311 and this property is also favorable for achieving the broad amino-acid perceptibility.

312 Another important structural characteristics of the ligand binding-pocket in

313 T1r2a/T1r3LBD is that the  $\alpha$ -substituent groups of the bound amino acid are recognized in  
314 hydrated states, and almost all interactions between the groups and the protein are made  
315 through water molecules [11]. Similar interactions were observed on the bacterial periplasmic  
316 oligopeptide-binding protein OppA, also able to bind peptides with widely varying amino  
317 acid sequences [26]. An extensive thermodynamic analysis of OppA revealed that the  
318 peptide-protein interactions clearly showed the enthalpy-entropy compensation phenomenon  
319 [26], where the enthalpy and entropy changes by the interactions are correlated and give  
320 opposite effects on the free energy [27]. A similar phenomenon might occur on T1r-amino  
321 acid binding and could make the contributions of each physicochemical property of the ligand  
322 to the free energy obscure.

323           However, it should be noted that the estimations of binding affinities in this study  
324 are indirect and approximate. In addition, the reason why lysine or aspartate induced thermal  
325 destabilization is unclear. Further structural and precise interaction analyses are required to  
326 elucidate the determinant of the ligand specificity of the receptor.

327

## 328 **Thermodynamic properties of T1r2a/T1r3LBD**

329           The DSF results not only provide information about the ligand binding to  
330 T1r2a/T1r3LBD, but also the thermodynamic properties of the protein itself. It is noteworthy  
331 that the protein shows biphasic melt curves in the presence of a high concentration of amino  
332 acids (Figs 1, 2, and S1 Fig). The profiles contrast with a previous report that human and  
333 mouse T1r2LBD, prepared as a single subunit by *E. coli* expression, showed two-state  
334 transitions between apo and ligand-bound forms by differential scanning calorimetry (DSC),  
335 indicating monophasic melting of the protein [28].

336           Several cases showing biphasic unfolding characteristics were reported, such as  
337 high-affinity ligand binding [29], an increase of the free ligand during the unfolding of the

338 protein caused by the release of the ligand from the denatured protein [30], and the presence  
339 of multiple structural regions with lower and higher stabilities [31]. While the former two  
340 cases unlikely occurred on T1r2a/T1r3LBD, because the biphasic features in those cases were  
341 observed at low concentrations of the ligands, the last case might conform with this protein.

342 T1r2a/T1r3LBD is composed of multiple structural elements, potentially showing  
343 different thermal stabilities: individual subunits, T1r2a and T1r3, which further consist of two  
344 subdomains LB1 and LB2, with the orthosteric amino-acid binding sites in between the  
345 subdomains, and the dimerization of the two subunits through intermolecular interaction  
346 between LB1 of each subunit, further connected by an intermolecular disulfide bond at a loop  
347 region atop the dimer [11]. The transition at the higher temperature side observed in this  
348 study, indicated as the second  $T_m$ , likely reflected the unfolding accompanied with the  
349 destruction of the amino-acid binding site determining the receptor specificity, because the  
350 extent of  $T_m$  shifts correlated with the extent of the conformational change of the LBD and the  
351 receptor responses (Table 1 and Fig 3). The site is most probably the orthosteric site in  
352 T1r2aLBD because the orthosteric amino-acid binding site in T1r2a shows discriminative  
353 ligand recognition manners compared to that in T1r3, although the latter site also shares  
354 amino-acid binding capability [11].

355 On the other hand, because the transition at the lower temperature side did not show  
356 the thermal stabilization associated with the addition of amino acid, it is unlikely associated  
357 with the destruction of the known amino-acid binding sites in T1r2a/T1r3LBD, including the  
358 unfolding of T1r3 subunit, which possesses an amino-acid binding site. We speculate that one  
359 of the candidate events related to this transition might be dimer decomposition. It has been  
360 reported that the extracellular domain of another class C GPCR, metabotropic glutamate  
361 receptor 2 dimer, is in a fast dynamic exchange between different conformational states  
362 regardless of the presence of agonist or antagonist, although the ligands change the



363 conformational equilibria [32], as is also observed in other GPCRs [33]. If the  
364 decomposition of the dimerization of T1r2aLBD and T1r3LBD is triggered not by a certain  
365 conformational state but by conformational exchange, then the speculation is in accord with  
366 the DSF results. The speculation is also in accord with the previous observation that a single  
367 subunit of T1r2LBD showed monophasic melting profiles [28].

368

## 369 **Future applicability to taste assays**

370 From a practical point of view, this study indicates the future applicability of DSF  
371 to a quantitative assay method for taste substances that induce gustation by T1r receptors, *i.e.*,  
372 sweet and umami. Effective assay methods to evaluate taste qualities and intensities are  
373 required for basic taste research in academia as well as for new taste-substance development  
374 in food industries. Currently, taste evaluation in these industries is mainly dependent on rating  
375 by human participants. Such sensory evaluations are scientifically verified by *in vivo* animal  
376 behavior tests or *in vitro* analyses as calcium influx assays using receptor-expressing cells  
377 with cytosolic calcium indicators or biomimetic sensors specialized to the detection of taste  
378 substances in research institutes, which are equipped with special devices or facilities that are  
379 required for the analyses. Compared to these methods, protein-based binding assays are  
380 advantageous to feasibility, reproducibility, and scalability. So far, protein-based assays of  
381 T1rs were attempted by the use of single subunit T1rLBDs obtained by refolding inclusion  
382 bodies expressed in *E. coli*, and they were applied to intrinsic tryptophan fluorescence  
383 measurement, circular dichroism measurement, isothermal titration calorimetry (ITC), NMR,  
384 and DSC [28, 34, 35]. We applied T1r2a/T1r3LBD from *O. latipes*, a sole T1rLBD  
385 heterodimer protein amenable for recombinant protein preparation at present, to ITC and a  
386 FRET analysis previously [11, 17]. However, all of these methods are either sample or time  
387 consuming, and not trivial. In contrast, DSF can serve as a high-throughput binding assay by

388 comparing the relative extent of the thermal stabilization of the protein.

389           However, a couple of points should be kept in mind for applying the method for an  
390 actual taste assay. The target site for some taste substances or inhibitors for T1rs, such as a  
391 sweet protein brazzein, cyclamate, and lactisole, are known to bind to the sites other than  
392 LBD of T1rs, such as transmembrane domain or the cysteine-rich domain, the downstream  
393 region of LBD at the extracellular side [10, 36, 37]. In such cases, the ligand binding is unable  
394 to be detected by DSF using LBD. In addition, since there are no known antagonists for  
395 T1r2a/T1r3 from *O. latipes*, we could not test whether agonists and antagonists can be  
396 distinguished by the use of DSF results. Various types of actions of amino acids, such as  
397 allosteric or inhibitory actions, might underlie a non-strict correlation between the ligand  
398 binding and receptor responses observed in this study, in addition to the situation that the  
399 comparisons were performed with the alternative or estimated values.

400           Nevertheless, DSF using T1rLBD is expected to serve as an effective screening  
401 method to find chemicals potentially serving as taste substances for T1rs at the first stage of  
402 research, followed by further analyses to clarify their actual activities. Since the binding  
403 manner of taste substances at the orthosteric site in LBD is likely common to T1rs, the  
404 method may be useful for sweet or umami substance screening if recombinant protein  
405 preparation of human T1rLBD is achieved in future.

406

## 407 **Acknowledgment**

408 We thank Dr. Harumi Fukada for her advice on data analysis and the manuscript.

409

## 410 **References**

411 1. Yarmolinsky DA, Zuker CS, Ryba NJ. Common sense about taste: from mammals

- 412 to insects. *Cell*. 2009;139(2):234-44. doi: 10.1016/j.cell.2009.10.001.
- 413 2. Liman ER, Zhang YV, Montell C. Peripheral coding of taste. *Neuron*.  
414 2014;81(5):984-1000. doi: 10.1016/j.neuron.2014.02.022.
- 415 3. Berridge KC. Measuring hedonic impact in animals and infants: microstructure of  
416 affective taste reactivity patterns. *Neurosci Biobehav Rev*. 2000;24(2):173-98.
- 417 4. Shi P, Zhang J. Contrasting modes of evolution between vertebrate sweet/umami  
418 receptor genes and bitter receptor genes. *Mol Biol Evol*. 2006;23(2):292-300. Epub  
419 2005/10/07. doi: msj028 [pii]  
420 10.1093/molbev/msj028.
- 421 5. Hoon MA, Adler E, Lindemeier J, Battey JF, Ryba NJ, Zuker CS. Putative  
422 mammalian taste receptors: a class of taste-specific GPCRs with distinct topographic  
423 selectivity. *Cell*. 1999;96(4):541-51.
- 424 6. Pin JP, Galvez T, Prezeau L. Evolution, structure, and activation mechanism of  
425 family 3/C G-protein-coupled receptors. *Pharmacol Ther*. 2003;98(3):325-54. Epub  
426 2003/06/05. doi: S016372580300038X [pii].
- 427 7. Nelson G, Hoon MA, Chandrashekar J, Zhang Y, Ryba NJ, Zuker CS. Mammalian  
428 sweet taste receptors. *Cell*. 2001;106(3):381-90. Epub 2001/08/18. doi:  
429 S0092-8674(01)00451-2 [pii].
- 430 8. Li X, Staszewski L, Xu H, Durick K, Zoller M, Adler E. Human receptors for sweet  
431 and umami taste. *Proc Natl Acad Sci U S A*. 2002;99(7):4692-6. Epub 2002/03/28. doi:  
432 10.1073/pnas.072090199  
433 072090199 [pii].
- 434 9. Nelson G, Chandrashekar J, Hoon MA, Feng L, Zhao G, Ryba NJ, et al. An  
435 amino-acid taste receptor. *Nature*. 2002;416(6877):199-202. Epub 2002/03/15. doi:  
436 10.1038/nature726

- 437 nature726 [pii].
- 438 10. Xu H, Staszewski L, Tang H, Adler E, Zoller M, Li X. Different functional roles of  
439 T1R subunits in the heteromeric taste receptors. Proc Natl Acad Sci U S A.  
440 2004;101(39):14258-63. Epub 2004/09/09. doi: 10.1073/pnas.0404384101  
441 0404384101 [pii].
- 442 11. Nuemket N, Yasui N, Kusakabe Y, Nomura Y, Atsumi N, Akiyama S, et al.  
443 Structural basis for perception of diverse chemical substances by T1r taste receptors. Nat  
444 Commun. 2017;8:15530. doi: 10.1038/ncomms15530.
- 445 12. Oike H, Nagai T, Furuyama A, Okada S, Aihara Y, Ishimaru Y, et al.  
446 Characterization of ligands for fish taste receptors. J Neurosci. 2007;27(21):5584-92. Epub  
447 2007/05/25. doi: 27/21/5584 [pii]  
448 10.1523/JNEUROSCI.0651-07.2007.
- 449 13. Toda Y, Nakagita T, Hayakawa T, Okada S, Narukawa M, Imai H, et al. Two  
450 distinct determinants of ligand specificity in T1R1/T1R3 (the umami taste receptor). J Biol  
451 Chem. 2013;288(52):36863-77. doi: 10.1074/jbc.M113.494443.
- 452 14. Kunishima N, Shimada Y, Tsuji Y, Sato T, Yamamoto M, Kumasaka T, et al.  
453 Structural basis of glutamate recognition by a dimeric metabotropic glutamate receptor.  
454 Nature. 2000;407(6807):971-7. Epub 2000/11/09. doi: 10.1038/35039564.
- 455 15. Geng Y, Bush M, Mosyak L, Wang F, Fan QR. Structural mechanism of ligand  
456 activation in human GABA(B) receptor. Nature. 2013;504(7479):254-9. Epub 2013/12/07.  
457 doi: nature12725 [pii]  
458 10.1038/nature12725.
- 459 16. Ashikawa Y, Ihara M, Matsuura N, Fukunaga Y, Kusakabe Y, Yamashita A.  
460 GFP-based evaluation system of recombinant expression through the secretory pathway in  
461 insect cells and its application to the extracellular domains of class C GPCRs. Protein Sci.

- 462 2011;20(10):1720-34. Epub 2011/08/02. doi: 10.1002/pro.707.
- 463 17. Nango E, Akiyama S, Maki-Yonekura S, Ashikawa Y, Kusakabe Y, Krayukhina E,  
464 et al. Taste substance binding elicits conformational change of taste receptor T1r heterodimer  
465 extracellular domains. *Sci Rep.* 2016;6:25745. doi: 10.1038/srep25745.
- 466 18. Niesen FH, Berglund H, Vedadi M. The use of differential scanning fluorimetry to  
467 detect ligand interactions that promote protein stability. *Nat Protoc.* 2007;2(9):2212-21. doi:  
468 10.1038/nprot.2007.321.
- 469 19. Poklar N, Lah J, Salobir M, Macek P, Vesnaver G. pH and temperature-induced  
470 molten globule-like denatured states of equinatoxin II: a study by UV-melting, DSC, far- and  
471 near-UV CD spectroscopy, and ANS fluorescence. *Biochemistry.* 1997;36(47):14345-52. doi:  
472 10.1021/bi971719v.
- 473 20. Pantoliano MW, Petrella EC, Kwasnoski JD, Lobanov VS, Myslik J, Graf E, et al.  
474 High-density miniaturized thermal shift assays as a general strategy for drug discovery. *J*  
475 *Biomol Screen.* 2001;6(6):429-40. doi: 10.1177/108705710100600609.
- 476 21. Yamashita A, Nango E, Ashikawa Y. A large-scale expression strategy for  
477 multimeric extracellular protein complexes using *Drosophila* S2 cells and its application to  
478 the recombinant expression of heterodimeric ligand-binding domains of taste receptor. *Protein*  
479 *Sci.* 2017;26(11):2291-301. doi: 10.1002/pro.3271.
- 480 22. Schellman JA. Macromolecular Binding. *Biopolymers.* 1975;14:999-1018.
- 481 23. Hansch C, Fujita T.  $\rho$ - $\sigma$ - $\pi$  Analysis. A Method for the Correlation of Biological  
482 Activity and Chemical Structure. *J Am Chem Soc.* 1964;86:1616-26.
- 483 24. Asao M, Shimizu R, Nakao K, Fujita T. QREG 2.05. Society of Computer  
484 Chemistry, Japan1997.
- 485 25. Koehl A, Hu H, Feng D, Sun B, Zhang Y, Robertson MJ, et al. Structural insights  
486 into the activation of metabotropic glutamate receptors. *Nature.* 2019;566(7742):79-84. doi:

487 10.1038/s41586-019-0881-4.

488 26. Sleight SH, Seavers PR, Wilkinson AJ, Ladbury JE, Tame JR. Crystallographic and  
489 calorimetric analysis of peptide binding to OppA protein. *J Mol Biol.* 1999;291(2):393-415.  
490 doi: 10.1006/jmbi.1999.2929.

491 27. Gilli P, Ferretti V, Gilli G, Borea PA. Enthalpy-Entropy Compensation in  
492 Drug-Receptor Binding. *J Phys Chem-US.* 1994;98(5):1515-8. doi: DOI  
493 10.1021/j100056a024.

494 28. Assadi-Porter FM, Radek J, Rao H, Tonelli M. Multimodal Ligand Binding Studies  
495 of Human and Mouse G-Coupled Taste Receptors to Correlate Their Species-Specific  
496 Sweetness Tasting Properties. *Molecules.* 2018;23(10). doi: 10.3390/molecules23102531.

497 29. Luan CH, Light SH, Dunne SF, Anderson WF. Ligand screening using fluorescence  
498 thermal shift analysis (FTS). *Methods Mol Biol.* 2014;1140:263-89. doi:  
499 10.1007/978-1-4939-0354-2\_20.

500 30. Shrake A, Ross PD. Ligand-induced biphasic protein denaturation. *J Biol Chem.*  
501 1990;265(9):5055-9.

502 31. Bjork I, Pol E. Biphasic transition curve on denaturation of chicken cystatin by  
503 guanidinium chloride. Evidence for an independently unfolding structural region. *FEBS Lett.*  
504 1992;299(1):66-8.

505 32. Olofsson L, Felekyan S, Doumazane E, Scholler P, Fabre L, Zwier JM, et al. Fine  
506 tuning of sub-millisecond conformational dynamics controls metabotropic glutamate  
507 receptors agonist efficacy. *Nat Commun.* 2014;5:5206. doi: 10.1038/ncomms6206.

508 33. Manglik A, Kobilka B. The role of protein dynamics in GPCR function: insights  
509 from the beta2AR and rhodopsin. *Curr Opin Cell Biol.* 2014;27:136-43. Epub 2014/02/19.  
510 doi: S0955-0674(14)00009-X [pii]

511 10.1016/j.ceb.2014.01.008.

- 512 34. Nie Y, Vignes S, Hobbs JR, Conn GL, Munger SD. Distinct contributions of T1R2  
513 and T1R3 taste receptor subunits to the detection of sweet stimuli. *Curr Biol.*  
514 2005;15(21):1948-52. Epub 2005/11/08. doi: S0960-9822(05)01107-3 [pii]  
515 10.1016/j.cub.2005.09.037.
- 516 35. Maitrepierre E, Sigoillot M, Le Pessot L, Briand L. Recombinant expression, in  
517 vitro refolding, and biophysical characterization of the N-terminal domain of T1R3 taste  
518 receptor. *Protein Expr Purif.* 2012;83(1):75-83. doi: 10.1016/j.pep.2012.03.006.
- 519 36. Jiang P, Cui M, Zhao B, Snyder LA, Benard LM, Osman R, et al. Identification of  
520 the cyclamate interaction site within the transmembrane domain of the human sweet taste  
521 receptor subunit T1R3. *J Biol Chem.* 2005;280(40):34296-305. doi:  
522 10.1074/jbc.M505255200.
- 523 37. Jiang P, Ji Q, Liu Z, Snyder LA, Benard LM, Margolskee RF, et al. The  
524 cysteine-rich region of T1R3 determines responses to intensely sweet proteins. *J Biol Chem.*  
525 2004;279(43):45068-75. doi: 10.1074/jbc.M406779200.

526

## 527 **Supporting information**

528 **S1 Fig. Thermal melt curves of T1r2a/T1r3LBD (top) and their derivatives (bottom) in**  
529 **the presence of 0.1, 1, and 10 mM of amino acids measured by DSF.**

530 **S2 Fig. Correlation between the DSF results and the response assay results.** (A) The  
531 thermal stabilization of LBD in the presence of 10 mM of amino acid, shown in  $\Delta T_m$ , is  
532 plotted on the full-length receptor responses to the same concentration of amino acid, shown  
533 in  $\Delta RFU$ . (B) The affinities to the LBD estimated by the DSF ( $pK_{d-app} = \log 1/K_{d-app}$ ) were  
534 plotted on the estimated amino acid potencies for the receptor activation ( $pEC_{50-est} = \log$   
535  $1/EC_{50-est}$ , estimated from the responses at 10 mM concentration). (C) The affinities to the  
536 LBD estimated by the DSF ( $pK_{d-app}$ ) were plotted on the estimated amino acid potencies for

- 537 the receptor activation ( $pEC_{50-est}$ , estimated from the responses at 5 mM concentration).
- 538 **S1 Table.  $\Delta T_m$  and derived  $K_{d-app}$  values estimated from the DSF results of**
- 539 **T1r2a/T13LBD at a single ligand concentration.**
- 540 **S2 Table.  $\Delta RFU$  and derived  $EC_{50-est}$  values derived from the response assay of**
- 541 **T1r2a/T13.**
- 542 **S3 Table. Affinities to mfT1r2a/T1r3LBD derived from the DSF results and**
- 543 **physicochemical parameters for the  $\alpha$ -substituent group of amino acids.**



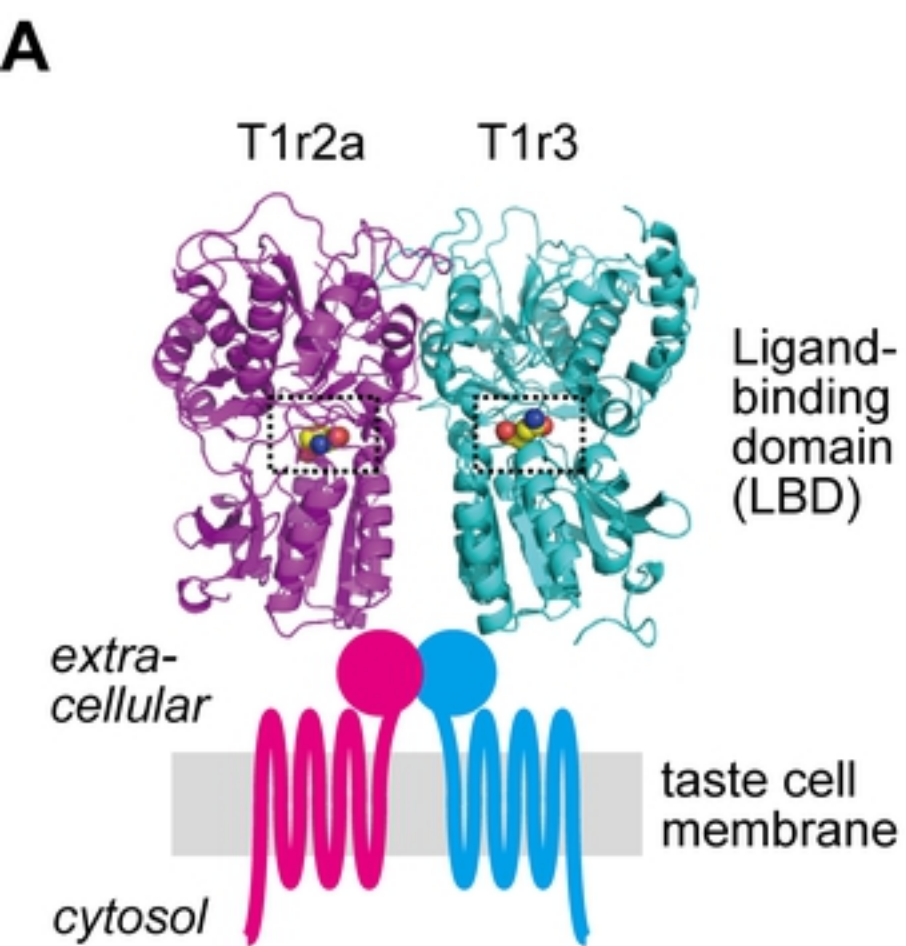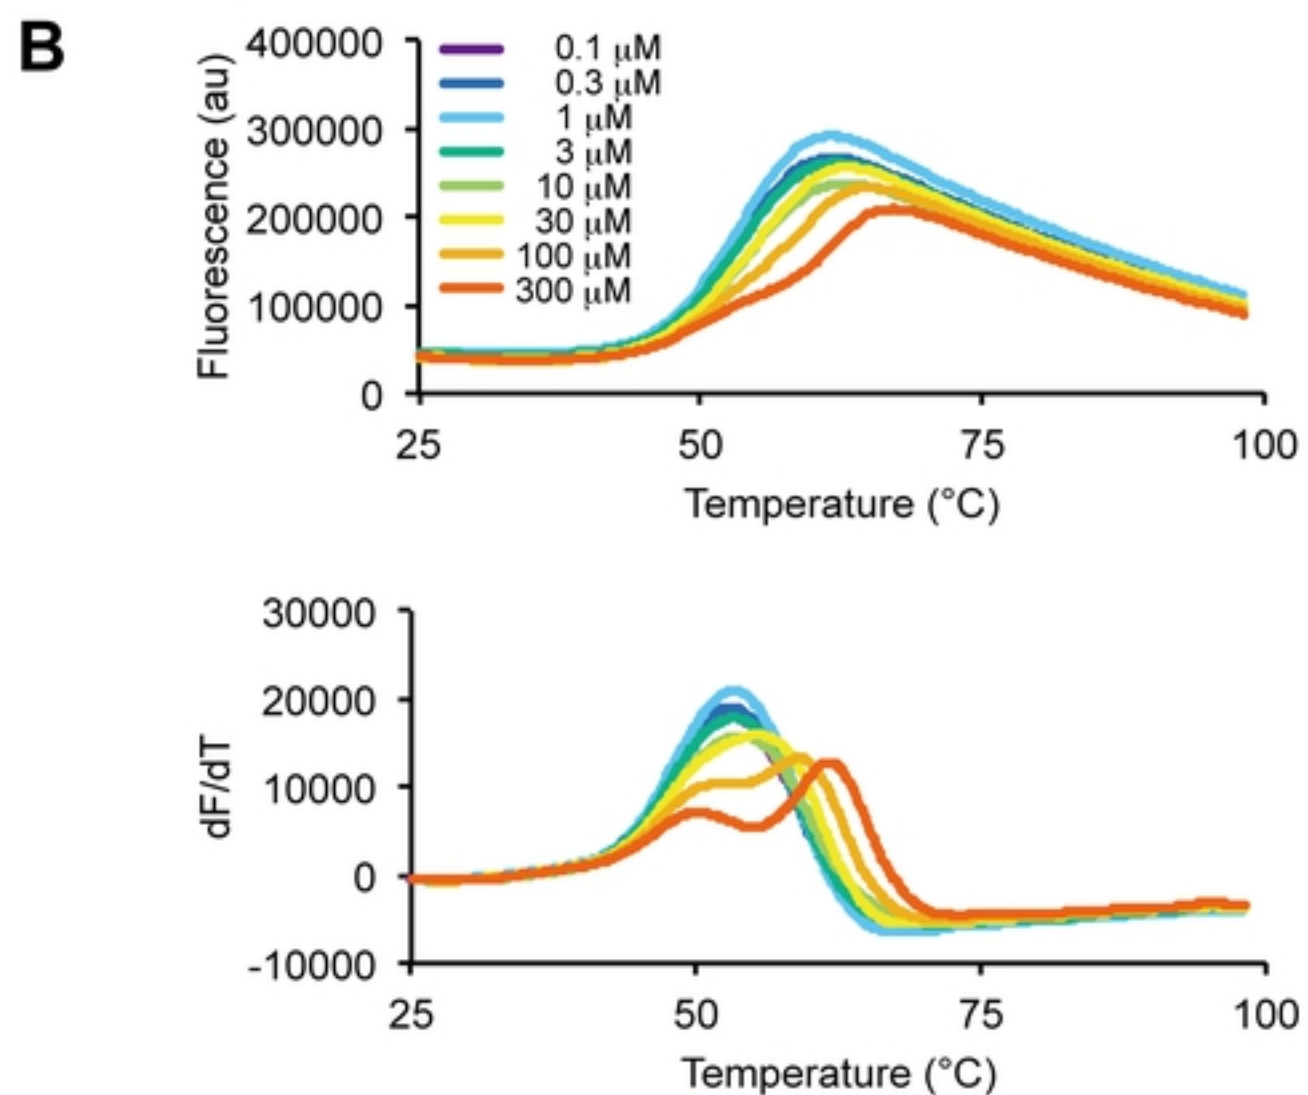

Figure 1

**A**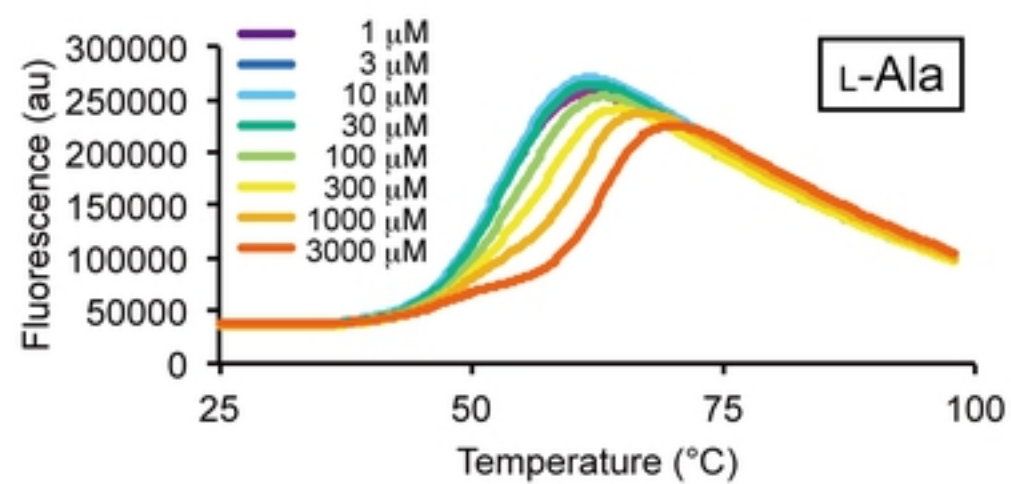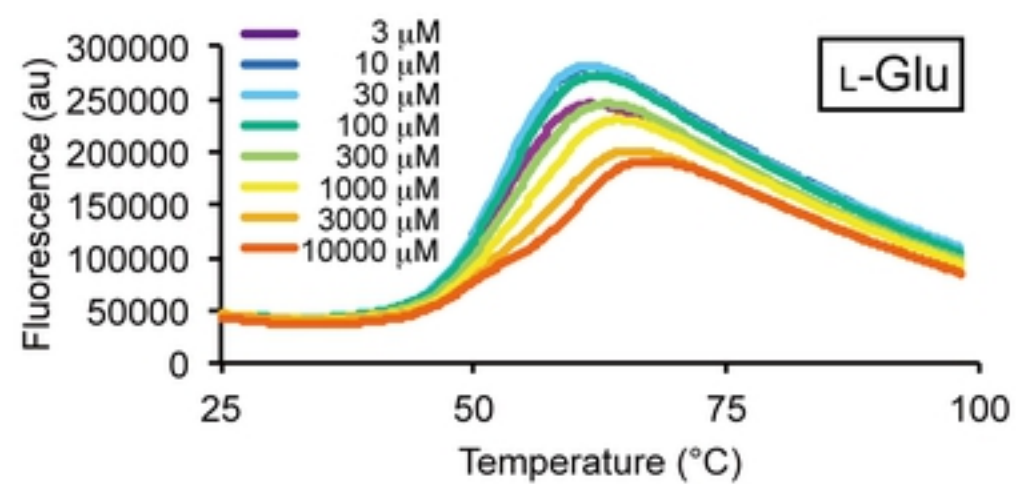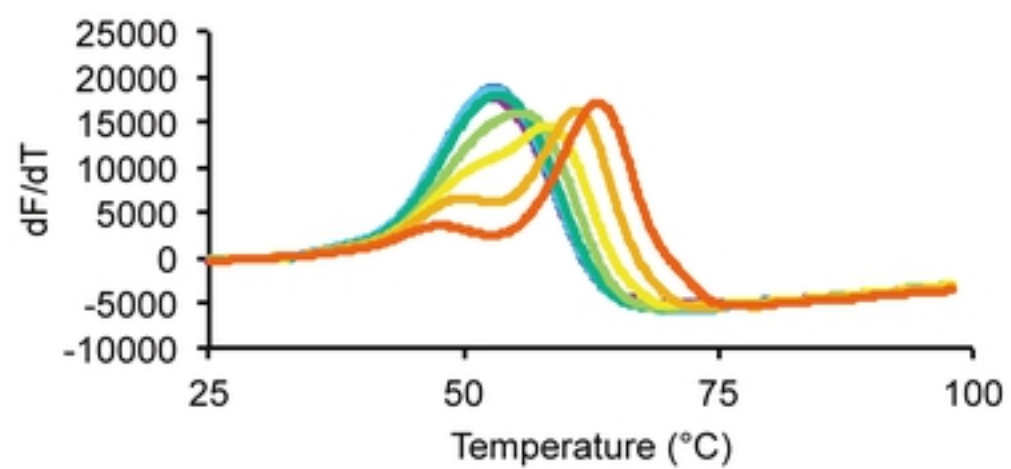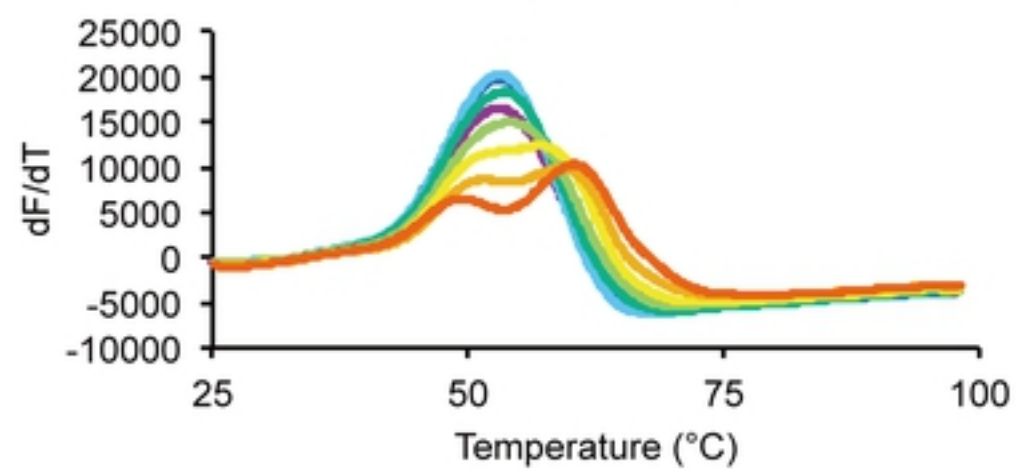

bioRxiv preprint doi: <https://doi.org/10.1101/670828>; this version posted June 13, 2019. The copyright holder for this preprint (which was not certified by peer review) is the author/funder, who has granted bioRxiv a license to display the preprint in perpetuity. It is made available under aCC-BY 4.0 International license.

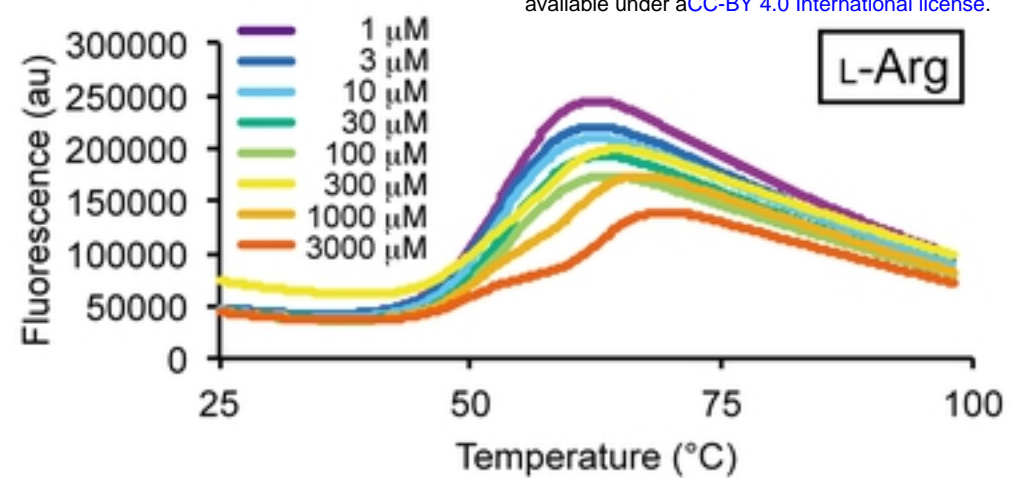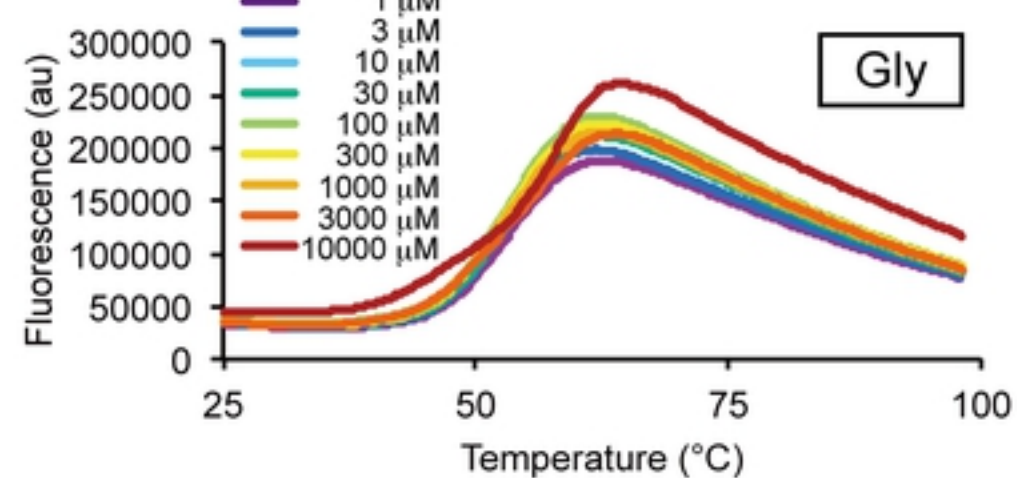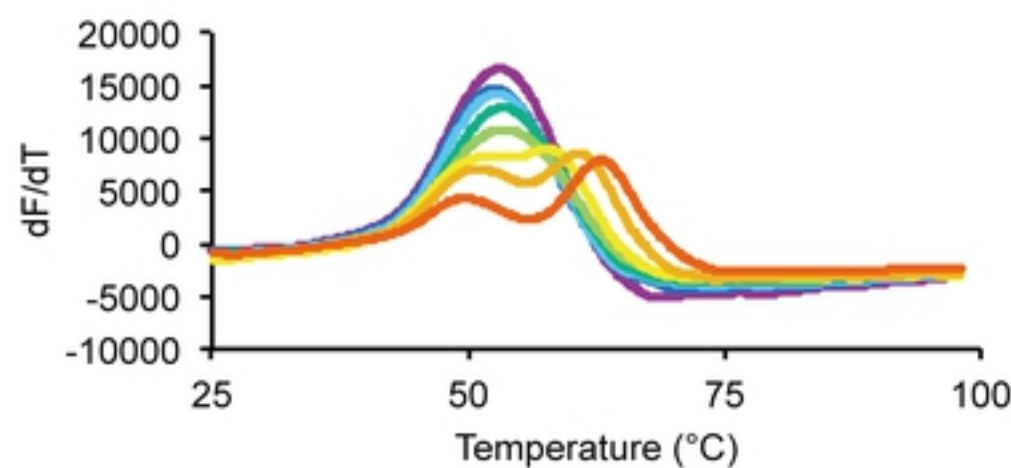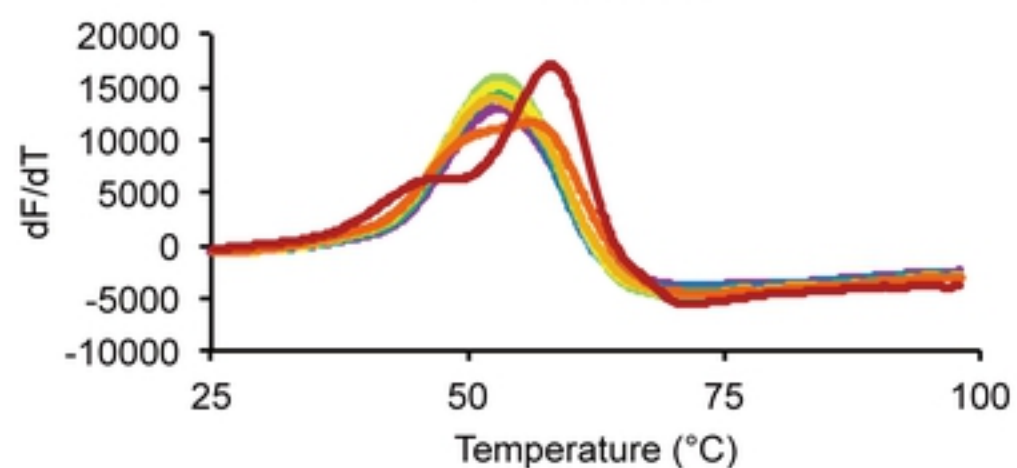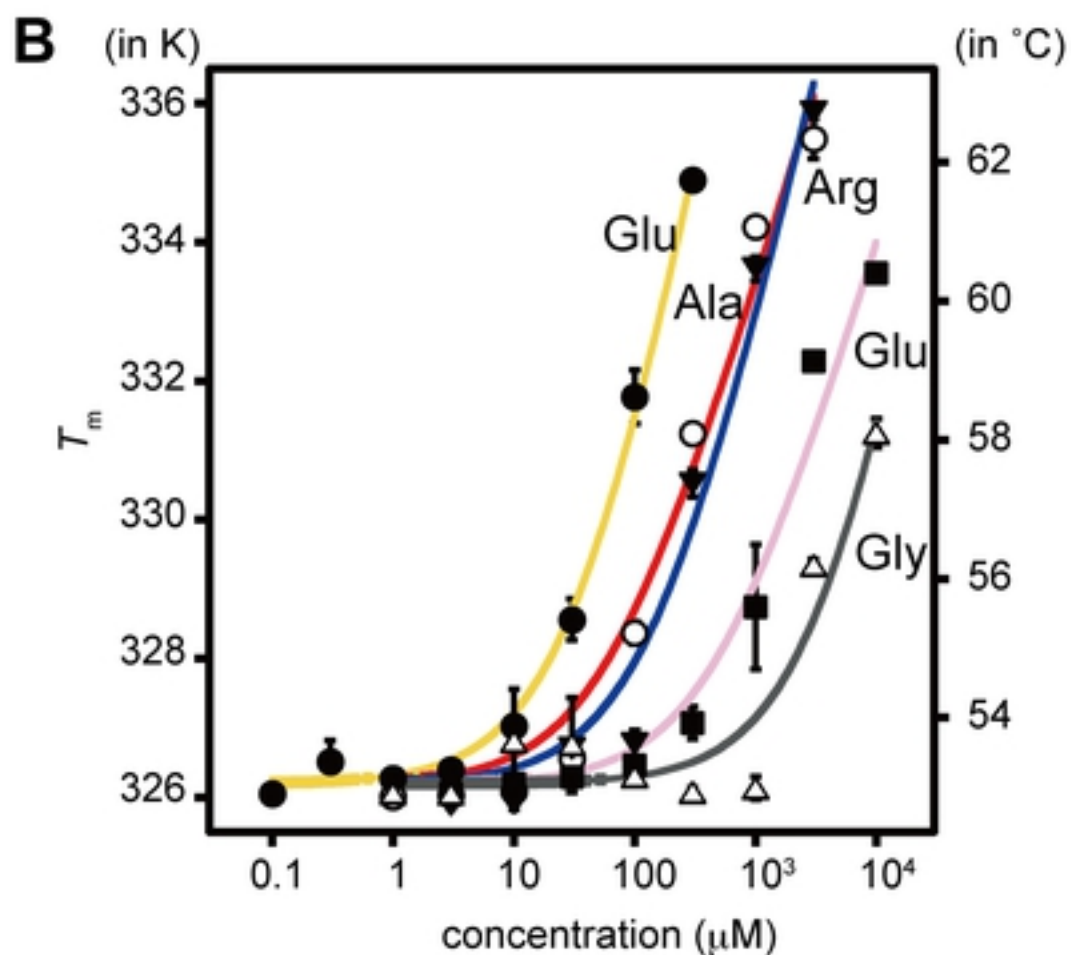

Figure 2

**A**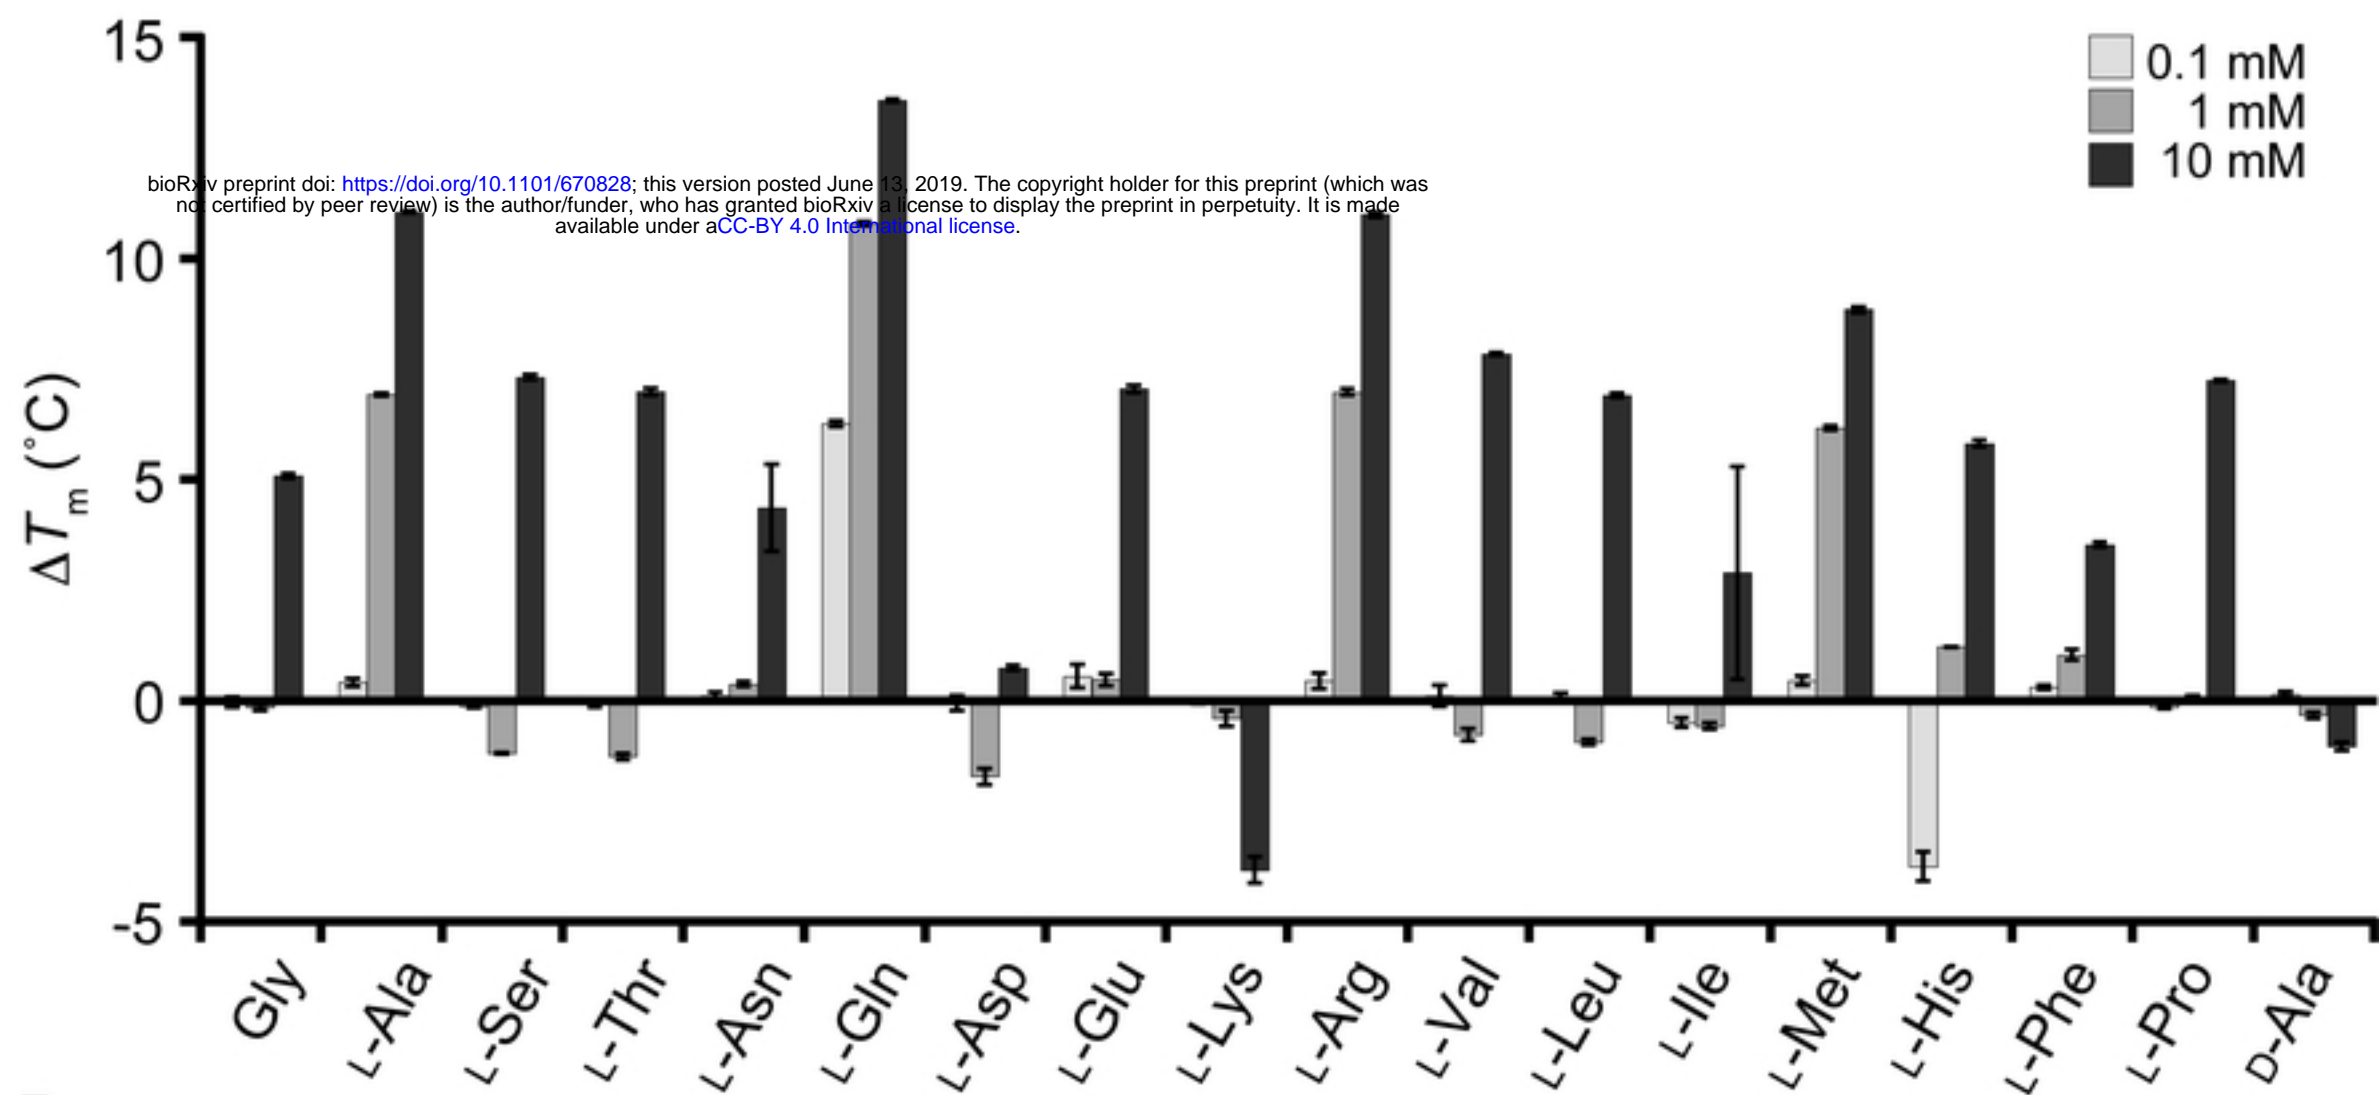**B**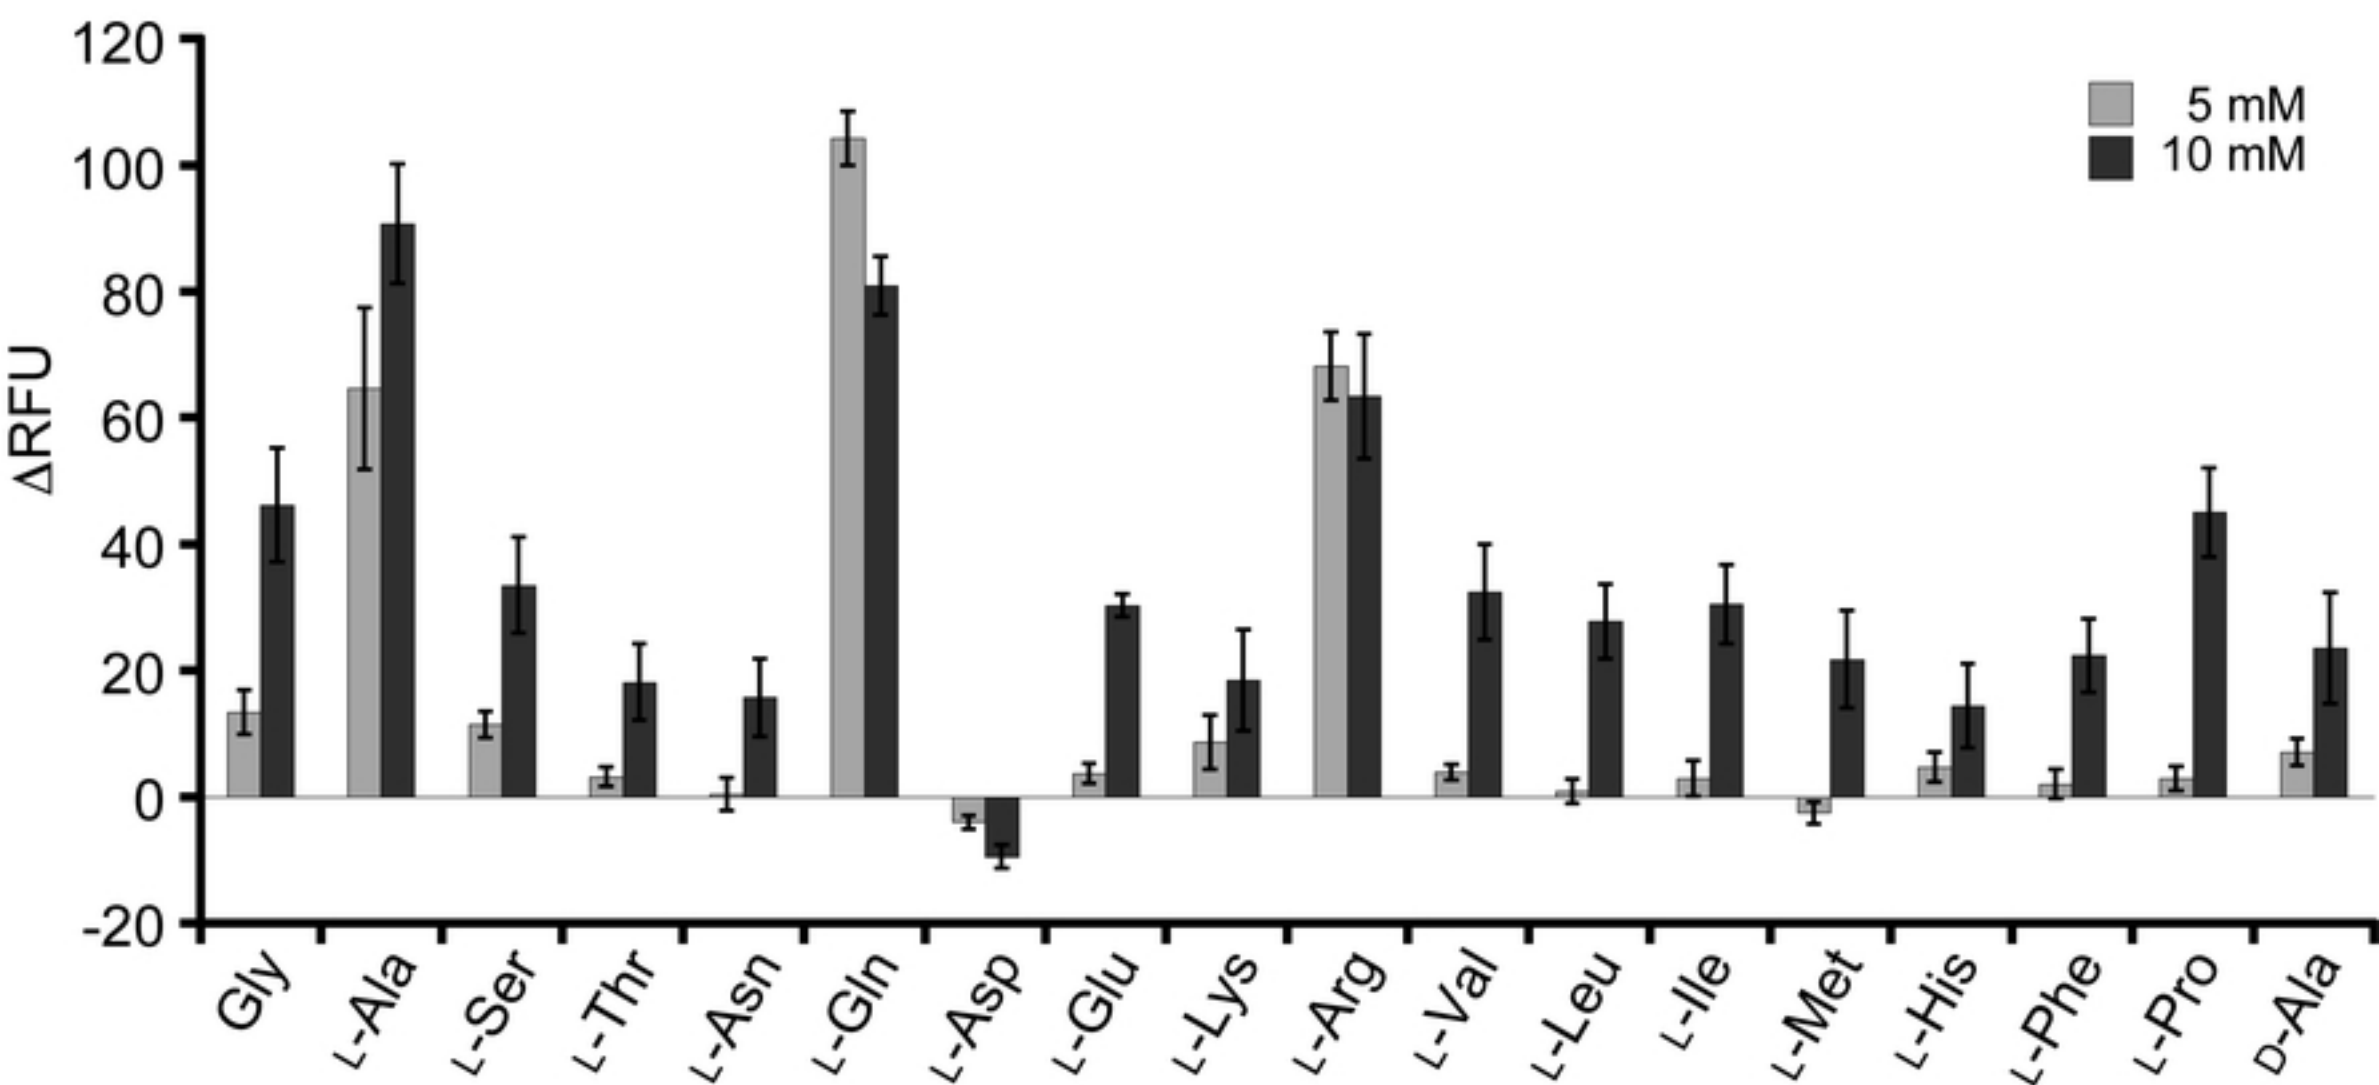

Figure 3
